# Supplementary material for: A high performance electrochemical sensor for acetaminophen based on a rGO–PEDOT nanotube composite modified electrode
Source: Royal Society of Chemistry journal article supplement (doi:10.1039/c4ta00309h), 2014-01-01
Supplement: c4ta00309h1.pdf [file c4ta00309h1.pdf]

## Electronic Supplementary Information

### A High Performance Electrochemical Sensor for Acetaminophen Based on rGO/PEDOT Nanotube Composite Modified Electrode

Tzu-Yen Huang<sup>a,b</sup>, Chung-Wei Kung<sup>a</sup>, Hung-Yu Wei<sup>b,c</sup>, Karunakara Moorthy Boopathi<sup>b,e</sup>,  
Chih-Wei Chu<sup>b,d,\*</sup>, Kuo-Chuan Ho<sup>a,c,\*</sup>

<sup>a</sup> Department of Chemical Engineering, National Taiwan University, Taipei 10617, Taiwan

<sup>b</sup> Research Center for Applied Sciences, Academia Sinica, Taipei 11529, Taiwan

<sup>c</sup> Institute of Polymer Science and Engineering, National Taiwan University, Taipei 10617, Taiwan

<sup>d</sup> Department of Photonics, National Chiao-Tung University, Hsinchu 30010, Taiwan

<sup>e</sup> Department of Engineering and System Science, National Tsing Hua University, Hsinchu 30010, Taiwan

\*Corresponding author. E-mail: kcho@ntu.edu.tw (K.-C.H.); gchu@gate.sinica.edu.tw (C.-W.C.). Telephone: +886-2-2366-0739 (K.-C.H.); +886-2-2789-8000, ext. 270 (C.-W.C.). Fax: +886-2-2362-3040 (K.-C.H.); +886-2-2782-6680 (C.-W.C.)

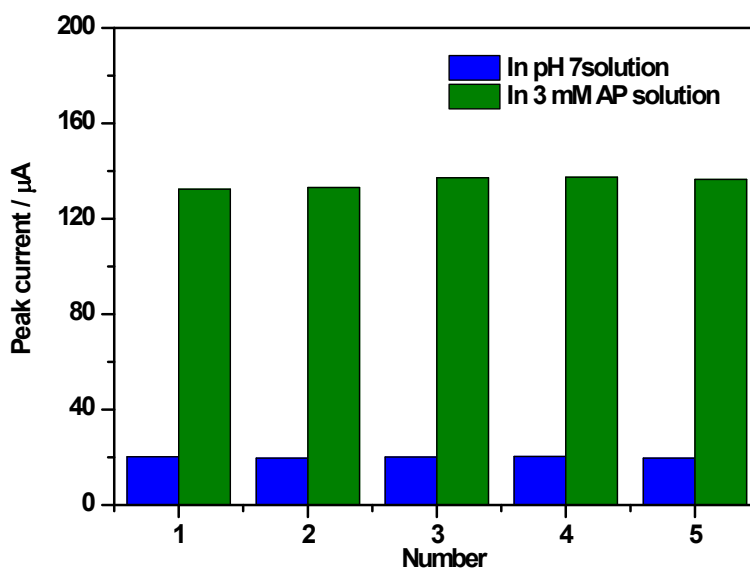

**Fig. S1** The reproducibility experiments for rGO/PEDOT NTs composite modified electrode.

| Sample Concentration( $\mu\text{m}$ ) | Spike ( $\mu\text{m}$ ) | Found ( $\mu\text{m}$ ) | Recovery (%) |
|---------------------------------------|-------------------------|-------------------------|--------------|
| 10.14                                 | 0                       | 9.43                    | 93.00        |
| 10.14                                 | 5                       | 14.49                   | 95.71        |
| 10.14                                 | 10                      | 19.96                   | 99.11        |
| 10.14                                 | 15                      | 25.19                   | 100.20       |

**Table. S1** The real sample analysis of rGO/PEDOT NTs modified electrode using the DPV method.
